# Supplementary material
Source: publisher figshare collection journal article supplement (https://aacr.figshare.com/articles/dataset/_/23145121)
Supplement: Supplementary file 1 [file 40851415]

**Supplementary Table S2. Adjusted or matched covariates and sex hormone measurement methods of studies included in the meta-analysis**

| First author                       | Year | Adjusted covariates                                                                                                                                                                                          | Matched covariates                                                                  | Source of controls  | Blood sample type | Sex hormone measurement methods                                                                      |
|------------------------------------|------|--------------------------------------------------------------------------------------------------------------------------------------------------------------------------------------------------------------|-------------------------------------------------------------------------------------|---------------------|-------------------|------------------------------------------------------------------------------------------------------|
| Ming-Whei Yu <sup>1</sup>          | 1993 | HBsAg carrier status, positivity of serum anti-HCV, cigarette smoking, alcohol drinking, past liver disease history, and dietary habits                                                                      | Age, date of questionnaire interview and blood collection, and residential township | Cancer-free control | Serum             | RIA                                                                                                  |
| Jian-Min Yuan <sup>2</sup>         | 1995 | Duration of cigarette smoking                                                                                                                                                                                | Age, time of blood sample collection, and neighborhood of residence                 | Cancer-free control | Serum             | RIA                                                                                                  |
| Nathalie Ganne-Carrie <sup>3</sup> | 1997 | Age, serum bilirubin and albumin                                                                                                                                                                             | -                                                                                   | Cirrhosis           | Serum             | Solid-phase assay                                                                                    |
| Anthony J. Alberg <sup>4</sup>     | 2000 | -                                                                                                                                                                                                            | Age, sex, and race                                                                  | Cancer-free control | Serum             | RIA                                                                                                  |
| Keitaro Tanaka <sup>5</sup>        | 2000 | Age, years since LC diagnosis, department, hospitalization status, heavy drinking history, albumin, aspartate aminotransferase, and AFP, the serostatus of HBsAg and anti-HCV, and other hormonal parameters | -                                                                                   | Cirrhosis           | Serum             | RIA (testosterone, free testosterone, estradiol), time-resolved fluoroimmunoassay (SHBG)             |
| Ming-Whei Yu <sup>6</sup>          | 2001 | Age at recruitment, the time of blood draw, ethnicity, years of education, cigarette smoking, alcohol consumption, history of chronic liver disease, BMI, and other hormone-related factors                  | Date of blood collection and year of birth                                          | HBV carriers        | Plasma            | Competitive immunoassay that uses direct chemiluminescent technology (testosterone), RIA (estradiol) |
| Marc J. Gunter <sup>7</sup>        | 2008 | Age, smoking, ethnicity, physical activity,                                                                                                                                                                  | -                                                                                   | Subcohort           | Serum             | Immunodiagnostic assay                                                                               |

|                                    |      |                                                                                                                                                                                                                                                                                              |                                                                                                                                                                                                |                     |        |                                                                                                                                 |
|------------------------------------|------|----------------------------------------------------------------------------------------------------------------------------------------------------------------------------------------------------------------------------------------------------------------------------------------------|------------------------------------------------------------------------------------------------------------------------------------------------------------------------------------------------|---------------------|--------|---------------------------------------------------------------------------------------------------------------------------------|
|                                    |      | waist circumference, use of NSAIDs in the preceding year, alcohol consumption, family history of colorectal cancer, history of colonoscopy, insulin, free IGF-I and HT/E2                                                                                                                    |                                                                                                                                                                                                |                     |        |                                                                                                                                 |
| Tess V. Clendenen <sup>8</sup>     | 2009 | BMI at enrollment, age, date of blood donation                                                                                                                                                                                                                                               | Age, date of blood donation                                                                                                                                                                    | Cancer-free control | Serum  | RIA (estrone, estradiol), two-site immunometric chemiluminescent assay (SHBG)                                                   |
| Jennifer H Lin <sup>9</sup>        | 2013 | Age at blood draw, study cohort, fasting status, and time for the blood draw, physical activity, family history of colorectal cancer in a first-degree relative, history of colorectal polyps, smoking status, current alcohol consumption, and screening examination, BMI, C-peptide levels | Age, fasting status, and time of day of blood draw (NHS were not matched to controls)                                                                                                          | Cancer-free control | Plasma | LC-MS/MS (estrone and estradiol in men and women and testosterone in women), EI (SHBG in men and women and testosterone in men) |
| Annekatriin Lukanova <sup>10</sup> | 2014 | BMI, smoking, ethanol at baseline, HBsAg/anti-HCV, diabetes, liver damage (a score based on albumin, bilirubin, AST, ALT, GGT, and AP concentrations outside normal range)                                                                                                                   | Recruitment center, sex, age, date, fasting status, and time of the day at blood collection; Women were additionally matched for menopausal status and exogenous hormone use at blood donation | Cancer-free control | Plasma | RIA (testosterone), immunoradiometric assay (SHBG)                                                                              |
| D. D Ørsted <sup>11</sup>          | 2014 | Smoking status, cumulative smoking,                                                                                                                                                                                                                                                          | -                                                                                                                                                                                              | Same cohort         | Plasma | Immunochemical assay                                                                                                            |

|                            |      |                                                                                                                                                                                        |                                                                                        |                     |        |                                                                                                                                               |
|----------------------------|------|----------------------------------------------------------------------------------------------------------------------------------------------------------------------------------------|----------------------------------------------------------------------------------------|---------------------|--------|-----------------------------------------------------------------------------------------------------------------------------------------------|
|                            |      | BMI, alcohol consumption, level of education, and level of income for both men and women; For women, parity, menopausal status, oral contraceptive use, and HRT were also adjusted for |                                                                                        |                     |        |                                                                                                                                               |
| Roni T. Falk <sup>12</sup> | 2015 | Clinic site, trial participation status, age at blood collection, and total BMD                                                                                                        | -                                                                                      | Subcohort           | Serum  | LC-MS/MS                                                                                                                                      |
| Neil Murphy <sup>13</sup>  | 2015 | Waist circumference, alcohol consumption, family history of colorectal cancer, physical activity, smoking status, NSAID use, insulin, free IGF-1, and CRP                              | Age, ethnicity, HT assignments, DM assignments, and CaD assignments                    | Cancer-free control | Serum  | RIA (estrone, estradiol, progesterone), two-site chemiluminescent immunoassay (SHBG)                                                          |
| Yi X. Chan <sup>14</sup>   | 2017 | Age, BMI, smoking status, physical activity, alcohol intake, diabetes mellitus, HDL, TG, and history of prevalent cancer                                                               | -                                                                                      | Same cohort         | Plasma | LC-MS/MS (testosterone, DHT, estradiol), chemiluminescent immunoassays (LH, SHBG)                                                             |
| Yi X. Chan <sup>15</sup>   | 2018 | Age, marital status, occupation, smoking, alcohol consumption, leisure time physical activity, BMI, and diabetes                                                                       | -                                                                                      | Same cohort         | Serum  | LC-MS/MS (testosterone, DHT, estradiol), chemiluminometric immunoassay (LH), enzyme immunometric assay with chemiluminescent substrate (SHBG) |
| Nagisa Mori <sup>16</sup>  | 2019 | BMI, smoking status, alcohol consumption, physical activity                                                                                                                            | Age, area code, population size of the area, season of blood collection, year of blood | Cancer-free control | Plasma | Electrochemiluminescence (estradiol, progesterone, testosterone), chemiluminescence enzyme                                                    |

|                                  |      |                                                                                                                                                                                                                                                                                                                                            |                                                                                                                                  |                     |              |                                                                |
|----------------------------------|------|--------------------------------------------------------------------------------------------------------------------------------------------------------------------------------------------------------------------------------------------------------------------------------------------------------------------------------------------|----------------------------------------------------------------------------------------------------------------------------------|---------------------|--------------|----------------------------------------------------------------|
|                                  |      |                                                                                                                                                                                                                                                                                                                                            | collection, and fasting time                                                                                                     |                     |              | immunoassay (SHBG)                                             |
| Jessica L. Petrick <sup>17</sup> | 2019 | Age, race/ethnicity, study year of blood draw, parent study, education, smoking status, number of cigarettes per day, BMI, and diabetes                                                                                                                                                                                                    | Study, age, race/ethnicity, year of blood draw, time of blood draw, and number of freeze-thaw cycles for available serum samples | Cancer-free control | Serum        | GC-MS (sex hormones), EI (SHBG)                                |
| Jessica L. Petrick <sup>18</sup> | 2020 | Age, matching factors, BMI, smoke status, alcohol status, HBsAg, anti-HCV, diabetes, and current MHT use                                                                                                                                                                                                                                   | Sex, cohort, age, race/ethnicity, and blood collection date                                                                      | Same cohort         | Serum/plasma | GC-MS/MS (sex hormones), EI (SHBG)                             |
| Rita Peila <sup>19</sup>         | 2020 | Age, ethnicity, education, smoking status, pack-years, alcohol, BMI, waist circumference, diabetes status, red and processed meat consumption, CRP, IGF-1, calcium, folate, vitamin D, physical activity, family history of colorectal cancer, ever screened for colorectal cancer; plus previous use of HRT and menopausal status (women) | -                                                                                                                                | Same cohort         | Serum        | Chemiluminescent immunoassay                                   |
| Rita Peila <sup>20</sup>         | 2020 | Age at recruitment, sex, education, race, smoking status and pack-years, alcohol intake, and BMI                                                                                                                                                                                                                                           | -                                                                                                                                | Same cohort         | Serum        | Chemiluminescent immunoassay                                   |
| Shao-Hua Xie <sup>21</sup>       | 2020 | Tobacco smoking, physical activity, BMI at baseline                                                                                                                                                                                                                                                                                        | Age, year of blood sample drawn, and health survey from where the                                                                | Cancer-free control | Serum        | LC-MS (testosterone, 17-OH progesterone, and androstenedione), |

|                                    |      |                                                                                                                                                                                                                                                                                   | participants were recruited                                                                                   |                      |        | immunoassays (others)                                                         |
|------------------------------------|------|-----------------------------------------------------------------------------------------------------------------------------------------------------------------------------------------------------------------------------------------------------------------------------------|---------------------------------------------------------------------------------------------------------------|----------------------|--------|-------------------------------------------------------------------------------|
| Terry Cheuk-Fung Yip <sup>22</sup> | 2020 | Baseline platelet, total bilirubin, alanine aminotransferase, age, cirrhosis, hypertension, albumin, INR, HBeAg positivity, time-weighted average HbA1c, use of metformin, sulfonylureas, insulin, statins, and antiviral therapy                                                 | -                                                                                                             | CHB patients with DM | Serum  | NA                                                                            |
| Una C. McMenamin <sup>23</sup>     | 2021 | Age at baseline, deprivation, smoking status, BMI, alcohol consumption (except EAC), diabetes, aspirin use, and statin use (CRC only)                                                                                                                                             | -                                                                                                             | Same cohort          | Serum  | Chemiluminescent immunoassay                                                  |
| Kara A. Michels <sup>24</sup>      | 2021 | Age and BMI, clinic enrollment site, and enrollment arm in the original FIT trial                                                                                                                                                                                                 | Age and clinical center                                                                                       | Subcohort            | Serum  | LC-MS/MS                                                                      |
| Nagisa Mori <sup>25</sup>          | 2021 | BMI, smoking status, physical activity, ever used hormone therapy, and alcohol consumption, estrone, estradiol, and testosterone for SHBG and vice versa                                                                                                                          | Age, study center, follow-up time since blood collection, time of day at blood collection, and fasting status | Cancer-free control  | Plasma | LC-MS (sex hormones), Solid-phase “sandwich” enzyme-linked immunoassay (SHBG) |
| Eleanor L. Watts <sup>26</sup>     | 2021 | Townsend deprivation score, education level, ethnic group, height, BMI, cigarette smoking, alcohol consumption, total physical activity, IGF-I, CRP, HbA1c. For postmenopausal women, additionally adjusted for past HRT use, past oral contraceptive pill use, parity and age at | -                                                                                                             | Same cohort          | Serum  | Chemiluminescent immunoassay                                                  |

|                             |      |                                                                                                                                                     |                                                            |                     |        |                                                                |
|-----------------------------|------|-----------------------------------------------------------------------------------------------------------------------------------------------------|------------------------------------------------------------|---------------------|--------|----------------------------------------------------------------|
|                             |      | first birth, age at menarche, and age at menopause                                                                                                  |                                                            |                     |        |                                                                |
| Zhikai Zhu <sup>27</sup>    | 2021 | Age, smoking status, alcohol drinking, BMI, trial, and other related sex steroid hormones or SHBG                                                   | Age at start of pills, date of blood collection and trials | Cancer-free control | Serum  | RIA, immunoassay                                               |
| Justin Harbs <sup>28</sup>  | 2022 | BMI, smoking status, physical activity, alcohol consumption; SHBG model additionally adjusted for levels of estradiol and testosterone              | Study center, age at and date of blood sample              | Cancer-free control | Plasma | LC-MS/MS (Sex hormones), enzyme-linked immunoassays kit (SHBG) |
| Mukhtar Ahmed <sup>29</sup> | 2023 | Age, sex, assessment centre, educational status, Townsend deprivation score, smoking, alcohol consumption, physical activity, and health diet score | -                                                          | Same cohort         | Serum  | Chemiluminescent immunoassay                                   |

**Abbreviations:** AFP,  $\alpha$ -fetoprotein; ALT, alanine aminotransaminase; anti-HCV, antibody to hepatitis C virus; AP, alkaline phosphatase; AST, aspartate aminotransaminase; BMD, bone mineral density; BMI, body mass index; CaD, calcium plus vitamin D; CHB, chronic hepatitis B; CRC, colorectal cancer; CRP, C-reactive protein; DHT, dihydrotestosterone; DM, diabetes mellitus; EAC, esophageal adenocarcinoma; EI, electrochemiluminescence immunoassay; FIT, Fracture Intervention Trial; GC-MS, gas chromatography-mass spectrometry; GC-MS/MS, gas chromatography selected reaction monitoring/tandem mass spectrometry assay; GGT, gamma-glutamyltransferase; HbA1c, glycated hemoglobin; HBeAg, hepatitis B e antigen; HBsAg, hepatitis B surface antigen; HBV, hepatitis B virus; HDL, high density lipoprotein; HRT, hormone replacement therapy; HT, hormone therapy; HT/E2, hormone therapy/estradiol; IGF-I, insulin-like growth factor-I; INR, international normalized ratio; LC, liver cancer; LC-MS, liquid chromatography-mass spectrometry; LC-MS/MS, liquid chromatography tandem mass spectrometry; LH, luteinizing hormone; MHT, menopausal hormone therapy; NA, not available; NHS, Nurses' Health Study; NSAID, nonsteroidal anti-inflammatory drug; RIA, radioimmunoassay; SHBG, sex hormone-binding globulin; TG, triglycerides; WHR, waist to hip ratio.

## References

1. Yu MW, Chen CJ. Elevated serum testosterone levels and risk of hepatocellular carcinoma. *Cancer Res* 1993;53(4):790–4.
2. Yuan JM, Ross RK, Stanczyk FZ, et al. A cohort study of serum testosterone and hepatocellular carcinoma in Shanghai, China. *Int J Cancer* 1995;63(4):491–3.
3. Ganne-Carrie N, Chastang C, Uzzan B, et al. Predictive value of serum sex hormone binding globulin for the occurrence of hepatocellular carcinoma in male patients with cirrhosis. *J Hepatol* 1997;26(1):96–102.
4. Alberg AJ, Gordon GB, Hoffman SC, et al. Serum dehydroepiandrosterone and dehydroepiandrosterone sulfate and the subsequent risk of developing colon cancer. *Cancer Epidemiol Biomarkers Prev* 2000;9(5):517–21.
5. Tanaka K, Sakai H, Hashizume M, et al. Serum testosterone:estradiol ratio and the development of hepatocellular carcinoma among male cirrhotic patients. *Cancer Res* 2000;60(18):5106–10.
6. Yu MW, Yang YC, Yang SY, et al. Hormonal markers and hepatitis B virus-related hepatocellular carcinoma risk: a nested case-control study among men. *J Natl Cancer Inst* 2001;93(21):1644–51.
7. Gunter MJ, Hoover DR, Yu H, et al. Insulin, insulin-like growth factor-I, endogenous estradiol, and risk of colorectal cancer in postmenopausal women. *Cancer Res* 2008;68(1):329–37.
8. Clendenen TV, Koenig KL, Shore RE, et al. Postmenopausal levels of endogenous sex hormones and risk of colorectal cancer. *Cancer Epidemiol Biomarkers Prev* 2009;18(1):275–81.
9. Lin JH, Zhang SM, Rexrode KM, et al. Association between sex hormones and colorectal cancer risk in men and women. *Clin Gastroenterol Hepatol* 2013;11(4):419-424.e1.
10. Lukanova A, Becker S, Husing A, et al. Prediagnostic plasma testosterone, sex hormone-binding globulin, IGF-I and hepatocellular carcinoma: etiological factors or risk markers? *Int J Cancer* 2014;134(1):164–73.
11. Orsted DD, Nordestgaard BG, Bojesen SE. Plasma testosterone in the general population, cancer prognosis and cancer risk: a prospective cohort study. *Ann Oncol* 2014;25(3):712–8.
12. Falk RT, Dallal CM, Lacey JV, et al. Estrogen Metabolites Are Not Associated with Colorectal Cancer Risk in Postmenopausal Women. *Cancer Epidemiol Biomarkers Prev* 2015;24(9):1419–22.
13. Murphy N, Strickler HD, Stanczyk FZ, et al. A Prospective Evaluation of Endogenous Sex Hormone Levels and Colorectal Cancer Risk in Postmenopausal

Women. *J Natl Cancer Inst* 2015;107(10):djv210.

14. Chan YX, Alfonso H, Chubb SAP, et al. Higher Dihydrotestosterone Is Associated with the Incidence of Lung Cancer in Older Men. *Horm Cancer* 2017;8(2):119–26.
15. Chan YX, Knuiaman MW, Divitini ML, et al. Lower Circulating Androgens Are Associated with Overall Cancer Risk and Prostate Cancer Risk in Men Aged 25–84 Years from the Busselton Health Study. *Horm Cancer* 2018;9(6):391–8.
16. Mori N, Sawada N, Iwasaki M, et al. Circulating sex hormone levels and colorectal cancer risk in Japanese postmenopausal women: The JPHC nested case-control study. *Int J Cancer* 2019;145(5):1238–44.
17. Petrick JL, Hyland PL, Caron P, et al. Associations Between Prediagnostic Concentrations of Circulating Sex Steroid Hormones and Esophageal/Gastric Cardia Adenocarcinoma Among Men. *J Natl Cancer Inst* 2019;111(1):34–41.
18. Petrick JL, Florio AA, Zhang X, et al. Associations Between Prediagnostic Concentrations of Circulating Sex Steroid Hormones and Liver Cancer Among Postmenopausal Women. *Hepatology* 2020;72(2):535–47.
19. Peila R, Arthur RS, Rohan TE. Sex hormones, SHBG and risk of colon and rectal cancer among men and women in the UK Biobank. *Cancer Epidemiol* 2020;69:101831.
20. Peila R, Arthur RS, Rohan TE. Association of Sex Hormones with Risk of Cancers of the Pancreas, Kidney, and Brain in the UK Biobank Cohort Study. *Cancer Epidemiol Biomarkers Prev* 2020;29(9):1832–6.
21. Xie SH, Ness-Jensen E, Rabbani S, et al. Circulating Sex Hormone Levels and Risk of Esophageal Adenocarcinoma in a Prospective Study in Men. *Am J Gastroenterol* 2020;115(2):216–23.
22. Yip TC, Wong GL, Chan HL, et al. Elevated testosterone increases risk of hepatocellular carcinoma in men with chronic hepatitis B and diabetes mellitus. *J Gastroenterol Hepatol* 2020;35(12):2210–9.
23. McMenamin UC, Liu P, Kunzmann AT, et al. Circulating Sex Hormones Are Associated With Gastric and Colorectal Cancers but Not Esophageal Adenocarcinoma in the UK Biobank. *Am J Gastroenterol* 2021;116(3):522–9.
24. Michels KA, Geczik AM, Bauer DC, et al. Endogenous Progestogens and Colorectal Cancer Risk among Postmenopausal Women. *Cancer Epidemiol Biomarkers Prev* 2021;30(6):1100–5.
25. Mori N, Keski-Rahkonen P, Gicquiau A, et al. Endogenous Circulating Sex Hormone Concentrations and Colon Cancer Risk in Postmenopausal Women: A Prospective Study and Meta-Analysis. *JNCI Cancer Spectr* 2021;5(6):pkab084.
26. Watts EL, Perez-Cornago A, Knuppel A, et al. Prospective analyses of testosterone and sex hormone-binding globulin with the risk of 19 types of cancer in men



and postmenopausal women in UK Biobank. *Int J Cancer* 2021;149(3):573–84.

27. Zhu Z, Chen Y, Ren J, et al. Serum Levels of Androgens, Estrogens, and Sex Hormone Binding Globulin and Risk of Primary Gastric Cancer in Chinese Men: A Nested Case-Control Study. *Cancer Prev Res (Phila)* 2021;14(6):659–66.
28. Harbs J, Rinaldi S, Gicquiau A, et al. Circulating Sex Hormone Levels and Colon Cancer Risk in Men: A Nested Case-Control Study and Meta-Analysis. *Cancer Epidemiol Biomarkers Prev* 2022;31(4):793–803.
29. Ahmed M, Mäkinen V-P, Lumsden A, et al. Metabolic profile predicts incident cancer: A large-scale population study in the UK Biobank. *Metabolism* 2023;138:155342.
